# Supplementary material
Source: PubMed Central journal article supplement (PMC3702170)
Supplement: NIHMS477349-supplement-Supplementary_Online_Content.pdf [file NIHMS477349-supplement-Supplementary_Online_Content.pdf]

## Supplementary Online Content

Sheets NC, Goldin GH, Meyer A-M, et al. Intensity-modulated radiation therapy, proton therapy, or conformal radiation therapy and morbidity and disease control in localized prostate cancer. *JAMA*. 2012;307(15):1611-1620.

**eTable 1.** Diagnoses and procedure codes

**eTable 2.** Unadjusted and Propensity-Model Adjusted Outcomes for IMRT vs CRT, Excluding Patients Who Had Any Health Maintenance Organization Enrollment for the Study Duration

**eTable 3.** Outcomes for IMRT vs Proton Therapy With Propensity Score Matching and Instrumental Variable Analyses, Excluding Patients Who Had Any Health Maintenance Organization Enrollment for the Study Duration

**eFigure.** Use of IMRT vs CRT for Primary Radiation Treatment for Localized Prostate Cancer

This supplementary material has been provided by the authors to give readers additional information about their work.

**eTable 1.** Diagnoses and procedure codes

| Type of Outcome       | Category                        |                             | CPT and ICD9 Codes                                                                                                                                                                                                                                                                                                                                                                                                                                             |
|-----------------------|---------------------------------|-----------------------------|----------------------------------------------------------------------------------------------------------------------------------------------------------------------------------------------------------------------------------------------------------------------------------------------------------------------------------------------------------------------------------------------------------------------------------------------------------------|
| <b>Cancer Therapy</b> | <b>Radiation</b>                | Brachytherapy               | 77326, 77327, 77328, 77776, 77777, 77778, 77781, 77782, 77783, 77784, 77790, 77799, Q3001, 92.2                                                                                                                                                                                                                                                                                                                                                                |
|                       |                                 | Conformal radiation therapy | 77305, 77310, 77315, 77321, 77371, 77372, 77373, 77402, 77403, 77404, 77406, 77407, 77408, 77409, 77411, 77412, 77413, 77414, 77416, 77422, 77423, 92.24, 92.26                                                                                                                                                                                                                                                                                                |
|                       |                                 | IMRT                        | 77301, 77418, 0073T                                                                                                                                                                                                                                                                                                                                                                                                                                            |
|                       |                                 | Proton therapy              | 77380, 77381, 77520, 77522, 77523, 77525                                                                                                                                                                                                                                                                                                                                                                                                                       |
|                       | <b>Androgen Deprivation</b>     | Orchiectomy                 | G9132, 54520, 54522, 54530, 54535, 54690, 62.3, 62.41, 62.42                                                                                                                                                                                                                                                                                                                                                                                                   |
|                       |                                 | Hormone Therapy             | 54520, 54522, 54530, 54535, 54690, J1050, J1051, J1950, J3315, J9202, J9217, J9218, J9219, J9165, S0175, C9216, C9430, G0356, J0128, S0165, S9560, 62.4, 62.41, 62.42                                                                                                                                                                                                                                                                                          |
|                       | <b>Surgery</b>                  | MIRP                        | 55866                                                                                                                                                                                                                                                                                                                                                                                                                                                          |
|                       |                                 | ORP                         | 55810, 55812, 55815, 55840, 55842, 55845, 60.5                                                                                                                                                                                                                                                                                                                                                                                                                 |
| <b>Morbidity</b>      | <b>Gastrointestinal</b>         | Diagnosis                   | 560.81, 560.89, 560.9, 787.91, 555, 556, 557, 558, 564.5, 569.3, 578.9, 565, 566, 569.2, 569.4, 569.8, 578, 565, 566, 569.2, 569.41, 569.81                                                                                                                                                                                                                                                                                                                    |
|                       |                                 | Procedure                   | 45.23, 48.23, 49.21, 48.24, 45.25, 49.23, 46.10, 48.62, 46.14, 46.03, 46.13, 46.11, 96.22, 96.23, 93.95, 48.73, 48.93, 46.1x, 48.31, 48.32, 48.33, 48.33, 48.31, 48.32, 48.93, 58.43, 57.83, 48.73, 49.1, 49.6, 49.7, 48.4 -48.7, 48.9, 49.73, 45300-45345, 45355-45387, 46600-46615, 44140-44160, 44204-44212, 45110-45123, 45905, 45910, 46700, 99183, G0167, 45800, 45805, 45820, 45825, 45562, 45563, 45000, 45005, 45020, 45500, 45800-45805, 45820-45825 |
|                       | <b>Non-Incontinence Urinary</b> | Diagnosis                   | 595.82, 596.7, 596.0, 598.x, 599.6, 788.2x, 599.82, 596.1, 596.2, 599.1                                                                                                                                                                                                                                                                                                                                                                                        |
|                       |                                 | Procedure                   | 57.93, 57.85, 57.91, 57.92, 58.0, 58.1, 58.3x, 58.44, 58.46, 58.47, 58.5, 58.6, 58.99, 60.95, 60.2x, 58.93, 59.4, 59.5, 59.6, 59.71, 59.79, 57.83, 57.84, 58.43,                                                                                                                                                                                                                                                                                               |

| Type of Outcome | Category             |           | CPT and ICD9 Codes                                                                                                                                                                                                      |
|-----------------|----------------------|-----------|-------------------------------------------------------------------------------------------------------------------------------------------------------------------------------------------------------------------------|
|                 |                      |           | 52275, 52276, 52281, 52510, 53010, 53400, 53405, 53410, 53415, 53420, 53425, 53600, 53601, 53605, 53620, 53621, 52601, 52612, 52614, 52620, 52630, 53850, 53852, 52282, 52283, 53447, 51841, 44660, 44661, 53520        |
|                 | Urinary Incontinence | Diagnosis | 788.3x                                                                                                                                                                                                                  |
|                 |                      | Procedure | 59.3, 59.72, 89.21, 89.22, 89.23, 89.24, 89.25, 51715, 53440, 51840, 53442, 53443, 53445, 51736, 51725, 51726, 51772, 51784, 51785, 51792, 51795, 51797, 51798, 51741                                                   |
|                 | Erectile             | Diagnosis | 607.84                                                                                                                                                                                                                  |
|                 |                      | Procedure | 64.94, 64.95, 64.96, 64.97, 54400, 54401, 54402, 54405, 54406, 54407, 54408, 54409, 54410, 54411, 54415, 54416, 54417, C1007, C1813, C2622, C3500, C8514, C8516, C8534, L7900, 54231, 54235, J0270, J0275, J2440, J2760 |
|                 | Hip fracture         | Diagnosis | 733.14, 733.97, 808, 805.6, 805.7, 806.6, 806.7, 820.x                                                                                                                                                                  |

**Abbreviations:** IMRT, intensity-modulated radiation therapy; MIRP, minimally-invasive radical prostatectomy; ORP, open radical prostatectomy.

**eTable 2.** Unadjusted and Propensity-Model Adjusted Outcomes for IMRT vs CRT, Excluding Patients Who Had Any Health Maintenance Organization Enrollment for the Study Duration

| Outcome per 100 Person-Years       | Unadjusted     |                  |      |                 |                  |      |                     | Adjusted <sup>a</sup> |                  |      |                 |                  |      |                     |
|------------------------------------|----------------|------------------|------|-----------------|------------------|------|---------------------|-----------------------|------------------|------|-----------------|------------------|------|---------------------|
|                                    | CRT (n = 5443) |                  |      | IMRT (n = 6025) |                  |      | IMRT vs CRT         | CRT (n = 5613)        |                  |      | IMRT (n = 5834) |                  |      | IMRT vs CRT         |
|                                    | Total Events   | 100 Person-Years | Rate | Total Events    | 100 Person-Years | Rate | Rate Ratio (95% CI) | Total Events          | 100 Person-Years | Rate | Total Events    | 100 Person-Years | Rate | Rate Ratio (95% CI) |
| Gastrointestinal events            |                |                  |      |                 |                  |      |                     |                       |                  |      |                 |                  |      |                     |
| Procedures (including colonoscopy) | 2818           | 165              | 17.1 | 2736            | 148              | 18.5 | 1.08 (1.02-1.14)    | 2657                  | 152              | 17.5 | 2782            | 157              | 17.7 | 1.01 (0.93-1.09)    |
| Diagnoses                          | 2614           | 179              | 14.6 | 2269            | 162              | 14.0 | 0.96 (0.90-1.02)    | 2528                  | 162              | 15.6 | 2396            | 173              | 13.9 | 0.89 (0.82-0.97)    |
| Urinary nonincontinent events      |                |                  |      |                 |                  |      |                     |                       |                  |      |                 |                  |      |                     |
| Procedures                         | 499            | 249              | 2.0  | 407             | 210              | 1.9  | 0.97 (0.85-1.11)    | 434                   | 221              | 2.0  | 454             | 230              | 2.0  | 1.01 (0.85-1.20)    |
| Diagnoses                          | 1785           | 210              | 8.5  | 1625            | 177              | 9.2  | 1.08 (1.01-1.16)    | 1730                  | 187              | 9.3  | 1734            | 190              | 9.1  | 0.98 (0.89-1.09)    |
| Urinary incontinence events        |                |                  |      |                 |                  |      |                     |                       |                  |      |                 |                  |      |                     |
| Procedures                         | 1691           | 209              | 8.1  | 1720            | 174              | 9.9  | 1.23 (1.14-1.32)    | 1661                  | 186              | 8.9  | 1751            | 188              | 9.3  | 1.04 (0.94-1.15)    |
| Diagnoses                          | 868            | 240              | 3.6  | 742             | 202              | 3.7  | 1.02 (0.92-1.12)    | 828                   | 213              | 3.9  | 825             | 221              | 3.7  | 0.96 (0.83-1.10)    |
| Erectile dysfunction events        |                |                  |      |                 |                  |      |                     |                       |                  |      |                 |                  |      |                     |
| Procedures                         | 181            | 258              | 0.7  | 183             | 215              | 0.9  | 1.21 (0.99-1.49)    | 190                   | 228              | 0.8  | 186             | 237              | 0.8  | 0.94 (0.70-1.27)    |
| Diagnoses                          | 1031           | 226              | 4.6  | 1241            | 186              | 6.7  | 1.46 (1.34-1.59)    | 1074                  | 201              | 5.4  | 1239            | 204              | 6.1  | 1.13 (1.01-1.28)    |
| Hip fracture                       | 265            | 257              | 1.0  | 171             | 215              | 0.8  | 0.77 (0.64-0.93)    | 242                   | 228              | 1.1  | 192             | 237              | 0.8  | 0.76 (0.59-0.99)    |
| Additional cancer therapy          | 810            | 257              | 3.2  | 539             | 223              | 2.4  | 0.77 (0.69-0.86)    | 761                   | 230              | 3.3  | 637             | 242              | 2.6  | 0.80 (0.68-0.93)    |

Abbreviations: CRT, conformal radiation therapy; IMRT, intensity-modulated radiation therapy.

<sup>a</sup>Rates shown are adjusted for the variables presented in Table 1, using propensity scores implemented by inverse probability of treatment weighting.

**eTable 3.** Outcomes for IMRT vs Proton Therapy With Propensity Score Matching and Instrumental Variable Analyses, Excluding Patients Who Had Any Health Maintenance Organization Enrollment for the Study Duration

| Outcome per 100 Person-Years       | Propensity Score Matcheda |                  |      |                  |                  |      |                     | Instrumental Variable Analysis |                  |      |                    |                  |      |                     |
|------------------------------------|---------------------------|------------------|------|------------------|------------------|------|---------------------|--------------------------------|------------------|------|--------------------|------------------|------|---------------------|
|                                    | IMRT (n = 639)            |                  |      | Proton (n = 639) |                  |      | IMRT vs PT          | IMRT (n = 7520)b               |                  |      | Proton (n = 1806)b |                  |      | IMRT vs PT          |
|                                    | Total Events              | 100 Person-Years | Rate | Total Events     | 100 Person-Years | Rate | Rate Ratio (95% CI) | Total Events                   | 100 Person-Years | Rate | Total Events       | 100 Person-Years | Rate | Rate Ratio (95% CI) |
| Gastrointestinal events            |                           |                  |      |                  |                  |      |                     |                                |                  |      |                    |                  |      |                     |
| Procedures (including colonoscopy) | 300                       | 15.4             | 19.5 | 329              | 14.8             | 22.2 | 0.88 (0.75-1.03)    | 2957                           | 159              | 18.6 | 850                | 38.4             | 22.1 | 0.59 (0.46-0.77)    |
| Diagnoses                          | 239                       | 16.8             | 14.2 | 288              | 15.3             | 18.8 | 0.76 (0.64-0.90)    | 2508                           | 171.1            | 14.7 | 692                | 41.7             | 16.6 | 0.61 (0.46-0.82)    |
| Urinary nonincontinent events      |                           |                  |      |                  |                  |      |                     |                                |                  |      |                    |                  |      |                     |
| Proceduresc                        | 34                        | 23.1             | 1.5  | 39               | 23.8             | 1.6  | 0.90 (0.57-1.42)    | 444                            | 216              | 2.1  | 109                | 57.7             | 1.9  | 1.57 (0.80-3.07)    |
| Diagnoses                          | 131                       | 20.2             | 6.5  | 138              | 21.0             | 6.6  | 0.99 (0.78-1.25)    | 1789                           | 185              | 9.7  | 439                | 49.9             | 8.8  | 1.08 (0.76-1.55)    |
| Urinary incontinence events        |                           |                  |      |                  |                  |      |                     |                                |                  |      |                    |                  |      |                     |
| Procedures                         | 135                       | 20.2             | 6.7  | 165              | 20.2             | 8.1  | 0.82 (0.65-1.03)    | 1936                           | 181.2            | 10.7 | 489                | 48.6             | 10.1 | 1.04 (0.73-1.47)    |
| Diagnosesc                         | 58                        | 22.6             | 2.6  | 79               | 22.8             | 3.5  | 0.74 (0.53-1.04)    | 795                            | 209.5            | 3.8  | 203                | 55.3             | 3.7  | 0.96 (0.58-1.59)    |
| Erectile dysfunction events        |                           |                  |      |                  |                  |      |                     |                                |                  |      |                    |                  |      |                     |
| Proceduresc                        | 25                        | 23.6             | 1.1  | 34               | 24.1             | 1.4  | 0.75 (0.45-1.26)    | 194                            | 221.5            | 0.9  | 66                 | 58.7             | 1.1  | 0.58 (0.24-1.43)    |
| Diagnoses                          | 138                       | 20.3             | 6.8  | 156              | 20.4             | 7.6  | 0.89 (0.71-1.12)    | 1383                           | 194.5            | 7.1  | 421                | 49.4             | 8.5  | 0.76 (0.52-1.11)    |
| Hip fractured                      | 17                        | 23.7             | 0.7  | 17               | 24.5             | 0.7  |                     | 183                            | 221.5            | 0.8  | 41                 | 59.2             | 0.7  | 1.36 (0.48-3.89)    |
| Additional cancer therapy          | 64                        | 24.3             | 2.6  | 50               | 25.4             | 2.0  | 1.33 (0.92-1.93)    | 567                            | 233.4            | 2.4  | 123                | 62.3             | 2.0  | 1.56 (0.83-2.95)    |

Abbreviation: IMRT, intensity-modulated radiation therapy.

<sup>a</sup>Rates shown are adjusted for the variables presented in Table 3, using propensity scores implemented by matching.

<sup>b</sup>Rates for IMRT and proton were adjusted with a 2-stage least-squares instrumental variable approach in which Radiation Therapy Oncology Group affiliation predicts proton use: this predicted value was subsequently used as exposure in an adjusted outcome model to estimate the effect of IMRT vs proton on the outcome.

<sup>c</sup>Because of zero cell counts, SEER region was not included in propensity score matched models.

<sup>d</sup>Because of the small number of events and zero cell counts in some covariates in the propensity score–matched model, rate ratio could not be calculated.

**eFigure:** Use of IMRT vs. CRT for primary radiation treatment for localized prostate cancer

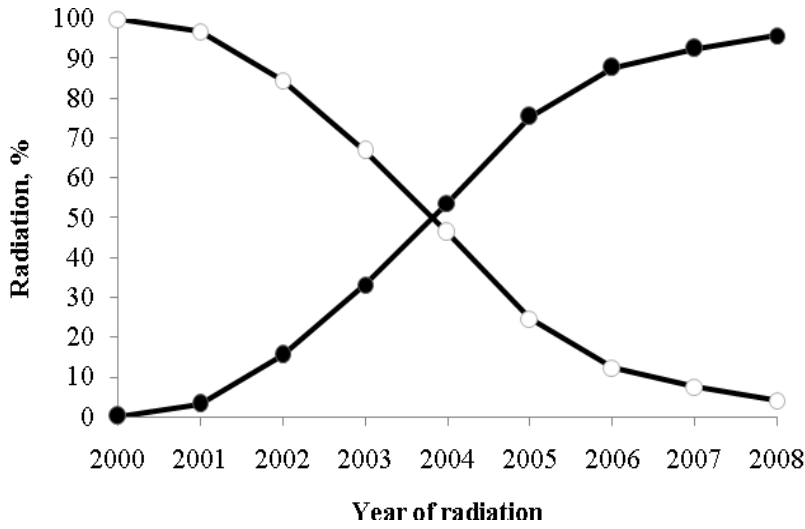

| Year | 2000 | 2001 | 2002 | 2003 | 2004 | 2005 | 2006 | 2007 | 2008 |
|------|------|------|------|------|------|------|------|------|------|
| IMRT | <11  | 93   | 448  | 917  | 1334 | 1841 | 2226 | 2671 | 787  |
| CRT  | 1971 | 2799 | 2450 | 1846 | 1149 | 601  | 312  | 215  | 34   |

**Abbreviations:** IMRT, intensity-modulated radiation therapy; CRT, conformal radiation therapy.

Black circles: IMRT

White circles: CRT
